# Supplementary material for: Morphological and Phylogenetic Characterisations Reveal Four New Species in Leptosphaeriaceae (Pleosporales, Dothideomycetes)
Source: MDPI journal article supplement (doi:10.3390/jof9060612), 2023-05-26
Supplement: s1 [file s1]

**Table S1.** Synopsis of sexual and asexual morphological characteristics of *Leptosphaeria* species with molecular data.

| Species name         | Host                                          | Country               | Ascomata              | Asci              |                                                      | Ascospore        |                                                                                                                           |       | References |
|----------------------|-----------------------------------------------|-----------------------|-----------------------|-------------------|------------------------------------------------------|------------------|---------------------------------------------------------------------------------------------------------------------------|-------|------------|
| Sexual morph         |                                               |                       | Size (µm)             | Size (µm)         | Shape                                                | Size (µm)        | Shape                                                                                                                     | Septa |            |
| <i>L. chatkalica</i> | Unknown                                       | Uzbekistan            | 306–400 ×<br>380–500  | 130–190 ×<br>9–12 | Cylindrical, long with club-like pedicellate.        | 20–30 ×<br>6–9   | Fusiform with narrow to acute at both ends, initially hyaline to yellowish-brown at maturity, mucilaginous sheath.        | 3     | [5]        |
| <i>L. cichorii</i>   | <i>Cichorium intybus</i>                      | Italy                 | 206–240 ×<br>251–363  | 71–115 ×<br>5–8   | Cylindrical, short pedicellate.                      | 11–20 ×<br>3–6   | Fusiform with acute ends to narrow rounded ends, reddish to yellowish-brown.                                              | 3     | [2]        |
| <i>L. cirsii</i>     | <i>Cirsium</i> sp.                            | Italy                 | 285–315 ×<br>335–360  | 75–110 ×<br>10–12 | Cylindric-clavate, short and broad pedicellate.      | 19–22 ×<br>4–4.5 | Ellipsoidal with narrow, rounded ends, initially hyaline, light brown to chestnut-brown at maturity, mucilaginous sheath. | 3     | [74]       |
| <i>L. conoidea</i>   | <i>Solidago</i> spp.                          | Europe, North America | Up to 500 in diameter | 75–135 ×<br>7–8   | –                                                    | 18–25 ×<br>5–7   | Ellipsoidal with obtuse rather than acute end cells, yellowish-brown.                                                     | 3     | [55]       |
| <i>L. doliolum</i>   | <i>Urtica dioica</i>                          | Italy, England        | 154–211 ×<br>160–225  | 52–71 ×<br>4–5    | Narrowly cylindrical, short-bulbous pedicellate.     | 15–19 ×<br>2–3   | Fusiform with acute to narrow rounded ends, yellowish-brown to brown.                                                     | 3     | [2,18]     |
| <i>L. ebuli</i>      | <i>Sambucus embulus</i>                       | Italy                 | 226–396 ×<br>241–251  | 80–109 ×<br>8–9   | Clavate to sub-cylindrical, short and broad pedicel. | 23–28 ×<br>4–5   | Ellipsoidal with broad rounded ends, initially hyaline, light brown to chestnut-brown at maturity.                        | 3     | [18]       |
| <i>L. errabunda</i>  | <i>Angelica</i> spp.,<br><i>Solidago</i> spp. | Europe, North America | Up to 450 in diameter | 80–100 ×<br>6–8   | Biseriate                                            | 20–35 ×<br>4–4.5 | Narrow, fusiform to ellipsoidal, brown, guttulate.                                                                        | 3     | [55]       |

| <i>L. italica</i>       | <i>Rhamnus alpinus</i>                             | Italy                                      | 285–294 ×<br>248–260   | 60–112 ×<br>7–12    | Cylindrical to cylindric-clavate, short pedicellate.                           | 12–18 ×<br>4–6             | Ellipsoid to broadly fusiform, with rounded to acute ends, pale brown to yellowish-brown.                           | 3     | [75]          |
|-------------------------|----------------------------------------------------|--------------------------------------------|------------------------|---------------------|--------------------------------------------------------------------------------|----------------------------|---------------------------------------------------------------------------------------------------------------------|-------|---------------|
| <i>L. irregularis</i>   | Unknown                                            | UK                                         | 245–370 ×<br>180–368   | 110–147 ×<br>6–8.5  | Long-cylindric, short and furcate pedicellate.                                 | 23.5–29 ×<br>5–7           | Fusiform, conical at the ends, initially hyaline, reddish to yellowish-brown at maturity.                           | 3     | [74]          |
| <i>L. regiae</i>        | <i>Juglans regiae</i>                              | Turkey                                     | 315–377 ×<br>364–410   | 99–130 ×<br>9–10    | Cylindrical to cylindric-clavate, short pedicellate.                           | 15–18 ×<br>6–7             | Ellipsoid to broadly fusiform, with rounded to acute ends, initially hyaline, yellowish-brown to brown at maturity. | 3     | [41]          |
| <i>L. slovacica</i>     | <i>Ballota nigra</i> ,<br><i>Leonurus cardiaca</i> | Netherlands                                | 275–375 in<br>diameter | 60–100 ×<br>5.5–7.5 | Biseriate in the upper part, uniseriate below.                                 | 18–28 ×<br>4.5–5.5         | Fusiform with acute ends, olivaceous yellow.                                                                        | 3     | [13,55]       |
| <i>L. sydownii</i>      | <i>Senecio</i> sp.,<br><i>Papaver rhoeas</i>       | Europe, UK,<br>Switzerland,<br>Netherlands | 300–350 in<br>diameter | 80–90 ×<br>11–12    | –                                                                              | 24–30 ×<br>6.5–7.5         | Broadly fusiform, yellowish-brown with guttules.                                                                    | 3     | [13]          |
| <i>L. urticae</i>       | <i>Urtica dioica</i>                               | UK                                         | 100–130 ×<br>70–110    | 60–140 ×<br>9–11    | Cylindrical, pedicellate.                                                      | 35–40 ×<br>4–6             | Long fusiform, initially hyaline, then yellowish-brown.                                                             | 8–9   | [3]           |
| <i>L. zhaotongensis</i> | Herbaceous                                         | China                                      | 380–550 ×<br>185–300   | 84–118 ×<br>7.7–11  | Cylindrical to cylindric-clavate.                                              | 16.2–<br>21.3 ×<br>4.5–6.5 | Fusiform, with narrow to acute at both ends, guttulate.                                                             | 3     | In this study |
| Species name            | Host                                               | Country                                    | Conidiomata            | Conidiogenous cells |                                                                                | Conidia                    |                                                                                                                     |       | References    |
| Asexual morph           |                                                    |                                            | Size (µm)              | Size (µm)           | Shape                                                                          | Size (µm)                  | Shape                                                                                                               | Septa |               |
| <i>L. cichorii</i>      | <i>Cichorium intybus</i>                           | Italy                                      | 189–200 ×<br>196–220   | 2–5 × 2–4           | Enteroblastic, phialidic, subglobose to short conical.                         | 3–6 ×<br>1–3               | Hyaline, oblong to elliptic, thin-walled, smooth, guttulate.                                                        | 0     | [2]           |
| <i>L. cirsii</i>        | <i>Cirsium</i> sp.                                 | Italy                                      | 150–200 ×<br>195–220   | 2–5 × 2–4           | Enteroblastic, phialidic, determinate integrated, subglobose to short conical. | 3–6 ×<br>1–3               | Hyaline, oblong to cylindrical, thin-walled, smooth, guttulate, rounded at both ends.                               | 0     | [74]          |

|                         |                                                     |                                         |                                      |                      |                                          |                                     |                                                                                                           |   |                  |
|-------------------------|-----------------------------------------------------|-----------------------------------------|--------------------------------------|----------------------|------------------------------------------|-------------------------------------|-----------------------------------------------------------------------------------------------------------|---|------------------|
| <i>L. conoidea</i>      | <i>Solidago</i> spp.                                | Europe,<br>North<br>America             | 250–800 ×<br>150–300                 | –                    | –                                        | 5–7 × 2<br>–3 or<br>7–12 ×<br>2–3   | Ellipsoidal to subcylindrical, eguttulate<br>or with 2 small polar guttules.                              | 1 | [55]             |
| <i>L. macrocapsa</i>    | <i>Mercurialis<br/>perennis</i>                     | Europe,<br>Netherlands                  | 400–600                              | –                    | –                                        | 3–5 × 1–<br>2                       | Ellipsoidal to subcylindrical, usually<br>with two conspicuous polar guttules.                            | – | [13,55]          |
| <i>L. pedicularis</i>   | <i>Pedicularis<br/>spp., Gentiana<br/>spp.</i>      | Europe,<br>Switzerland                  | 300–600 in<br>diameter               | –                    | –                                        | 4–8.5 ×<br>2–3 or<br>4–6 ×<br>2–4.5 | Oblong to ellipsoidal, subcylindrical or<br>allantoid, or oval ovoid or subglobose.                       | – | [13,55]          |
| <i>L. sclerotioides</i> | <i>Melilotus<br/>albus,<br/>Medicago<br/>sativa</i> | Eurasia,<br>North<br>America,<br>Canada | 200–1000<br>in<br>diameter           | –                    | –                                        | 4.5–6 ×<br>1.5–3                    | Ellipsoidal to subcylindrical, eguttulate<br>or with 1–4 polar guttules.                                  | – | [13,55]          |
| <i>L. slovacica</i>     | <i>Ballota nigra,<br/>Leonurus<br/>cardiaca</i>     | Europe                                  | 200–300 in<br>diameter               | –                    | –                                        | 3.5–5.5<br>× 1.5–<br>2.5            | Oblong to ellipsoidal, with 2 minutes<br>polar guttules.                                                  | – | [55]             |
| <i>L. sydowii</i>       | <i>Senecio</i> sp.                                  | Europe, UK                              | 300–450 in<br>diameter               | –                    | –                                        | 4–8.5 ×<br>1.5–2.5                  | Irregular, oblong-ellipsoidal to<br>subcylindrical, with 2-several small,<br>more or less polar guttules. | – | [55]             |
| <i>L. veronicae</i>     | <i>Veronica</i> sp.                                 | Netherlands                             | 200–350 in<br>diameter               | –                    | –                                        | 3.5–6 ×<br>1–2                      | Ellipsoidal to subcylindrical, with 2-<br>several more or less polar guttules.                            | – | [13,55]          |
| <i>L. yunnanensis</i>   | Herbaceous                                          | China                                   | 280–515<br>diam ×<br>170–370<br>high | 2.8–6.4 ×<br>3.8–6.7 | Ampulliform or globose to<br>subglobose, | 2.5–6.6<br>× 1–1.8                  | Ellipsoidal to sub-cylindrical with<br>obtuse ends.                                                       | 0 | In this<br>study |

Remarks: “–” means Not reported.

**Table S2.** Synopsis of sexual and asexual morphological characteristics of *Paraleptosphaeria* species with molecular data.

| Species name                                           | Host                                                         | Country                     | Ascomata          | Asci               |                                                                                                                          | Ascospores          |                                                                                                    |            | References    |
|--------------------------------------------------------|--------------------------------------------------------------|-----------------------------|-------------------|--------------------|--------------------------------------------------------------------------------------------------------------------------|---------------------|----------------------------------------------------------------------------------------------------|------------|---------------|
| Sexual morph                                           |                                                              |                             | Size (µm)         | Size (µm)          | Shape                                                                                                                    | Size (µm)           | Shape                                                                                              | septa      |               |
| <i>Pa. dryadis</i> as <i>Leptosphaeria dryadophila</i> | <i>Dryas octopetala</i>                                      | Switzerland                 | 150–250 × 180–275 | 72–118 × 10.8–13.6 | Cylindrical, thin-walled but with a thickened rounded apex, short-stalked.                                               | 20.1–24.5 × 5.7–7.2 | Fusiform to slightly clavate, with acute end-cell shape, slightly curved.                          | 3(–4–5)    | [13,76]       |
| <i>Pa. kunmingensis</i>                                | Herbaceous                                                   | China                       | 215–300 × 145–220 | 70–104 × 12–16.4   | Cylindrical to cylindric-clavate, short pedicellate with club-like pedicel, with ocular chamber                          | 33.5–50.5 × 5–7.2   | Lunate to long fusiform or inequilateral, straight or slightly curved.                             | 1–3        | In this study |
| <i>Pa. macrospora</i>                                  | <i>Rumex domesticus</i>                                      | Norway                      | -                 | 105 × 18           | Oblongish                                                                                                                | 44 × 8              | Cylindrical-fusiform                                                                               | 3          | [13, 54]      |
| <i>Pa. nitschkei</i>                                   | Petasites, <i>Cirsium spinosissimum</i> , <i>Cacalia</i> sp. | Italy, Switzerland, Austria | 200–400           | 80–100 × 11–13     | –                                                                                                                        | 26–40 × 4.5–6       | –                                                                                                  | –          | [13, 18,77]   |
| <i>Pa. padi</i>                                        | <i>Prunus padus</i>                                          | Russia                      | 288–345 × 330–396 | 74–127 × 8–14      | Bitunicate, broad-cylindrical, with club-shaped pedicel, apically rounded, ocular chamber clearly visible when immature. | 16–21 × 6–7         | Broad-fusiform, conical at the apex, constricted at the septa, pale brown.                         | (2)–3      | [19]          |
| <i>Pa. polylepidis</i>                                 | <i>Polylepis tarapacana</i>                                  | Bolivia                     | 300–700 × 300–600 | 120–250 × 20–45    | Bitunicate, cylindrical-clavate, slightly curved, with a short stipe, apically widened, with an ocular chamber.          | 45–60 × 14–23       | Pale brown, broadly ellipsoidal, narrower at the top, constricted at septa, uniformly thin-walled, | (2–)3 (–4) | [20,78]       |

|                         |                            |         |                   |                     |                                                                                |               | without perispore or gelatinous coat.                                                                  |         |            |
|-------------------------|----------------------------|---------|-------------------|---------------------|--------------------------------------------------------------------------------|---------------|--------------------------------------------------------------------------------------------------------|---------|------------|
| <i>Pa. praetermissa</i> | <i>Rubus idaeus</i>        | Sweden  | –                 | 110 × 10–11         | Cylindrical                                                                    | 18–32 × 7–10  | –                                                                                                      | 3       | [13,54]    |
| <i>Pa. rubi</i>         | <i>Rubus</i> sp.           | Italy   | 150–200 × 200–250 | 60–80 × 10–15       | Bitunicate, fissitunicate, cylindrical, short pedicel, with an ocular chamber. | 20–30 × 5–15  | Hyaline, ellipsoidal, deeply constricted at the septum, straight or slightly curved, guttulate.        | 1       | [2]        |
| Species name            | Host                       | Country | Conidia           | Conidiogenous cells |                                                                                | Conidia       |                                                                                                        |         | References |
| Asexual morph           |                            |         | Size (µm)         | Size (µm)           | Shape                                                                          | Size (µm)     | Shape                                                                                                  | septa   |            |
| <i>Pa. orobanches</i>   | <i>Epifagus virginiana</i> | USA     | 130–370 × 110–333 | –                   | –                                                                              | 2–4 × 1–1.5   | Ellipsoidal to oblong, sometimes guttulate.                                                            | –       | [13,79]    |
| <i>Pa. rumicis</i>      | <i>Rumex alpinus</i>       | France  | up to 300         | 7–15 × 5–7          | Hyaline, smooth, ampulliform.                                                  | 32–70 × 2–2.5 | Hyaline, granular, acicular, straight to gently curved, tapering towards apex that is acutely rounded. | up to 8 | [17,80]    |

Remarks: “–” means Not reported.

**Table S3.** Synopsis of sexual and asexual morphological characteristics of *Plenodomus* species with molecular data.

| Species name       | Host                         | Country     | Ascomata  | Asci           |       | Ascospore   |                                                                  |       | References |
|--------------------|------------------------------|-------------|-----------|----------------|-------|-------------|------------------------------------------------------------------|-------|------------|
| Sexual morph       |                              |             | Size (µm) | Size (µm)      | Shape | Size (µm)   | Shape                                                            | Septa |            |
| <i>Pl. agnitus</i> | <i>Eupatorium cannabinum</i> | Netherlands | 350–500   | 110–125 × 9–11 | –     | 31–35 × 4–5 | Narrowly subcylindrical, third cell from above slightly swollen, | 6     | [13,55]    |

|                         |                                                                                      |                                            |                   |                 |                                                                                                  |               |                                                                                                                                              |     |             |
|-------------------------|--------------------------------------------------------------------------------------|--------------------------------------------|-------------------|-----------------|--------------------------------------------------------------------------------------------------|---------------|----------------------------------------------------------------------------------------------------------------------------------------------|-----|-------------|
|                         |                                                                                      |                                            |                   |                 |                                                                                                  |               | yellowish brown with 2 guttules per cell.                                                                                                    |     |             |
| <i>Pl. artemisiae</i>   | <i>Artemisia</i> sp.                                                                 | China                                      | 140–280 × 300–450 | 64–100 × 9.5–13 | Fissitunicate, cylindrical, short, pedicellate, apically rounded with a distinct ocular chamber. | 28–40 × 4.5–6 | Pale brown, fusiform, slightly constricted at the septa, enlarge at the third cell from above, lacking a mucilaginous sheath and appendages. | 5   | [3]         |
| <i>Pl. biglobosus</i>   | <i>Brassica juncea</i>                                                               | France                                     | 280–350           | 100–140 × 12–20 | Bitunicate, cylindrical-clavate,                                                                 | 42–60 × 6–7   | Fusiform.                                                                                                                                    | 3–5 | [81]        |
| <i>Pl. collinsoniae</i> | <i>Vitis coignetiae</i>                                                              | Japan                                      | 270–350           | 75 × 10         | Cylindrical, short-stipitate.                                                                    | 30–32 × 4     | Amber colored, straight or nearly so, widest in the middle, gradually narrowing to the subacute ends.                                        | 5–8 | [13,54, 82] |
| <i>Pl. confertus</i>    | <i>Anacyclus radiatus</i>                                                            | Spain                                      | –                 | 140–150 × 16    | –                                                                                                | 50–55 × 6     | –                                                                                                                                            | 3–5 | [13,54]     |
| <i>Pl. congestus</i>    | <i>Erigeron canadensis</i>                                                           | Spain                                      | 380–400           | 92–120 × 12–14  | Cylindrical                                                                                      | 24–32 × 7–8   | –                                                                                                                                            | 3   | [13,83]     |
| <i>Pl. enteroleucus</i> | <i>Pyrus communis</i> ,<br><i>Triticum aestivum</i> ,<br><i>Catalpa bignonioides</i> | France,<br>German<br>y,<br>Netherl<br>ands | –                 | –               | –                                                                                                | 4–1.5         | Ovoidal, oblongish                                                                                                                           | –   | [13,84]     |
| <i>Pl. fallaciosus</i>  | <i>Satureia montana</i>                                                              | France                                     | 200–300           | 70–14           | Oblongish, clavate                                                                               | 47–50 × 4–5   | Cylindrical                                                                                                                                  | 7   | [13,85]     |

|                         |                                                                         |                        |                       |                     |                                                                                                                             |                    |                                                                                                                                                                                                   |                  |         |
|-------------------------|-------------------------------------------------------------------------|------------------------|-----------------------|---------------------|-----------------------------------------------------------------------------------------------------------------------------|--------------------|---------------------------------------------------------------------------------------------------------------------------------------------------------------------------------------------------|------------------|---------|
| <i>Pl. guttulatus</i>   | Dead stem                                                               | Germany                | 230–325 ×<br>260–310  | 70–72 × 5–<br>8     | Fissitunicate, cylindrical,<br>with a bulbous pedicel,<br>rounded at the apex, with an<br>ocular chamber.                   | 22– 24 ×<br>2–3    | Long fusiform, not or<br>slightly constricted at<br>each septum, cell above<br>central septum slightly<br>wider, guttulate only at<br>the central cells, lacking a<br>mucilaginous sheath.        | 5                | [2]     |
| <i>Pl. hendersoniae</i> | <i>Salix cinerea</i> ,<br><i>Pyrus malus</i>                            | Sweden,<br>Netherlands | –                     | 96 × 12             | Cylindrical                                                                                                                 | 16 × 6             | Oblongish                                                                                                                                                                                         | 3                | [13,86] |
| <i>Pl. libanotidis</i>  | <i>Seseli libanotis</i>                                                 | Sweden                 | –                     |                     | Elongated                                                                                                                   | 20 × 8             | Oblongish, fusiform.                                                                                                                                                                              | 3                | [13,87] |
| <i>Pl. pimpinellae</i>  | <i>Pimpinella<br/>anisum</i>                                            | Israel                 | 300–400 ×<br>500      | 90–120 ×<br>14–16   | Clavate, short pedicellate                                                                                                  | 50–65 ×<br>5.5–6.5 | Fusiform                                                                                                                                                                                          | 5–<br>6(–<br>10) | [13,88] |
| <i>Pl. salviae</i>      | <i>Salvia glutinosa</i>                                                 | Italy                  | 130–250 ×<br>150– 280 | 57–88 ×<br>8.6–11.4 | Fissitunicate, cylindrical,<br>with short bulbous pedicel,<br>rounded at the apex, with a<br>distinct ocular chamber.       | 30–48 ×<br>3.1–4.3 | Cylindric-fusiform, not or<br>slightly constricted at<br>each septum, lacking a<br>mucilaginous sheath.                                                                                           | 5                | [2]     |
| <i>Pl. sinensis</i>     | fern, <i>Ageratina<br/>adenophora</i> ,<br><i>Tamarindus<br/>indica</i> | China                  | 250–290 ×<br>300–360  | 75–107 ×<br>8.5–12  | Fissitunicate, cylindrical to<br>cylindric-clavate, sessile<br>to short pedicellate, with<br>knob-like to truncate pedicel. | 30–39 × 4–<br>6.5  | Fusiform, widest at the<br>third cell, slightly<br>constricted at the septa,<br>deeply constricted at the<br>third septum from above,<br>inconspicuous minute<br>appendages at both end<br>cells. | 6                | [3]     |

| <i>Pl. triseptatus</i>        | <i>Daucus carota</i> L.          | Russia                 | 276–324 ×<br>217–250 | 58–112 ×<br>7–13     | Fssitunicate, cylindrical,<br>short pedicel, with furcate<br>ends, apically rounded, with<br>welldeveloped ocular<br>chamber.                      | 19–25 ×<br>5.7–7.2 | Fusiform, with pointed<br>ends, slightly constricted<br>at the septa.                                                                                                      | 3         | [40]             |
|-------------------------------|----------------------------------|------------------------|----------------------|----------------------|----------------------------------------------------------------------------------------------------------------------------------------------------|--------------------|----------------------------------------------------------------------------------------------------------------------------------------------------------------------------|-----------|------------------|
| <i>Pl. visci</i>              | <i>Viscum album</i>              | France,<br>Hungar<br>y | 350                  | 110–140 ×<br>13–17   | Cylindrical to subclavate,<br>apically blunt rounded with<br>a small ocular chamber.                                                               | 28–38 × 6–<br>8    | Cylindrical to slightly<br>clavate, upper part<br>somewhat broader, lower<br>part slightly tapered, end<br>cells conical to rounded,<br>olive.                             | (5–)<br>7 | [13,39]          |
| <i>Pl.<br/>zhaotongensis</i>  | Herbaceous<br>plant              | China                  | 200–300 ×<br>210–320 | 80–132 ×<br>10–14    | Fissitunicate, bitunicate,<br>cylindric-clavate, short<br>pedicellate with foot-like<br>pedicel, with ocular chamber,<br>thick-walled at the apex. | 34–42 ×<br>3.5–6   | lunate to long fusiform,<br>straight or slightly<br>curved,often constricted<br>at medium septum,<br>widest at the middle,<br>rounded or slightly<br>pointed at both ends. | 6         | In this<br>study |
| Species name                  | Host                             | Country                | Conidiom<br>ata      | Conidiogenous cells  |                                                                                                                                                    | Conidia            |                                                                                                                                                                            |           | Refere<br>nces   |
| Asexual<br>morph              |                                  |                        |                      | Size (µm)            | Shape                                                                                                                                              | Size (µm)          | Shape                                                                                                                                                                      | sep<br>ta |                  |
| <i>Pl. agnitus</i>            | <i>Eupatorium<br/>cannabinum</i> | Netherl<br>ands        | 125–250              | –                    | –                                                                                                                                                  | 4–7 × 1.5–<br>2    | Oblong-ellip-soidal,<br>straight or slightly<br>curved, with two<br>inconspicuous guttules.                                                                                | –         | [13,55]          |
| <i>Pl.<br/>changchunensis</i> | Poaceae sp                       | China                  | 163–192 ×<br>193–245 | 2.8–5.8 ×<br>1.5–2.8 | Enteroblastic, phialidic,<br>determinate.                                                                                                          | 5-7.6 × 2-<br>3.4  | Oblong or oval, slightly<br>curved toward the ends,<br>rounded ends, hyaline,<br>smooth-walled.                                                                            | 0         | [6]              |



|                          |                                                 |                            |                      |                 |                                                                                                                                                                                              |                      |                                                                     |   |         |
|--------------------------|-------------------------------------------------|----------------------------|----------------------|-----------------|----------------------------------------------------------------------------------------------------------------------------------------------------------------------------------------------|----------------------|---------------------------------------------------------------------|---|---------|
| <i>Pl. deqinensis</i>    | Soil                                            | China                      | 150–355 ×<br>105–305 | 5–7 × 4–<br>6.5 | Phialidic, hyaline, smooth,<br>ampulliform.                                                                                                                                                  | 3.5–5.5 ×<br>1.5–2.5 | Ellipsoidal-cylindrical,<br>smooth- and thin-walled.                | 0 | [25]    |
| <i>Pl. hendersoniae</i>  | <i>Salix cinerea</i> ,<br><i>Pyrus malus</i>    | Sweden,<br>Netherl<br>ands | –                    | –               | –                                                                                                                                                                                            | 16–18 × 6            | –                                                                   | 3 | [13,86] |
| <i>Pl. influorescens</i> | <i>Lilium</i> sp.,<br><i>Fraxinus excelsior</i> | Netherl<br>ands            | –                    | –               | –                                                                                                                                                                                            | 3–4 × 1–<br>1.5      | Ellipsoidal or ovoid.                                               | – | [13,89] |
| <i>Pl. lijiangensis</i>  | Fern                                            | China                      | 140–290 ×<br>135–240 | 4–9 × 5–8       | Enteroblastic, phialidic,<br>discrete, determinate,<br>ampulliform to doliiform,<br>hyaline, smooth, with minute<br>collarete, with 1–2 apertures.                                           | 3–5 × 1.7–<br>2.3    | Hyaline, oblong to<br>obovoid, smooth-walled,<br>with 1–2 guttules. | 0 | [3]     |
| <i>Pl. lupini</i>        | <i>Lupinus<br/>mutabilis</i>                    | Peru                       | –                    | –               | –                                                                                                                                                                                            | 2.5 × 1              | Oblong                                                              | – | [13,90] |
| <i>Pl. pimpinellae</i>   | <i>Pimpinella<br/>anisum</i>                    | Israel                     | 300                  | –               | –                                                                                                                                                                                            | 4–4.5 ×<br>1.2–1.8   | Cylindrical                                                         | 0 | [13,88] |
| <i>Pl. sinensis</i>      | Fern                                            | China                      | 50–120 ×<br>50–110   | 3–8 × 4–8       | Enteroblastic, phialidic,<br>discrete, determinate,<br>ampulliform to doliiform,<br>collarete, and periclinal wall<br>thickening, arising from the<br>inner cavity of the conidioma<br>wall. | 2.7–4 × 1–<br>2      | Hyaline, oblong, slightly<br>curved, smooth-walled.                 | 0 | [3]     |
| <i>Pl. tracheiphilus</i> | <i>Citrus limonium</i> ,<br><i>Citrus</i> sp.   | Israel,<br>Italy           | 100–180              | –               | Enteroblastic, phialidic,<br>hyaline, simple,<br>ampulliform, completely<br>lining the inside of the<br>pycnidial cavity.                                                                    | 2–3 × 1              | Unicellular, straight or<br>curved, with apices<br>rounded.         | 0 | [13,91] |

|                  |                     |                    |         |   |   |         |                                                                    |   |         |
|------------------|---------------------|--------------------|---------|---|---|---------|--------------------------------------------------------------------|---|---------|
| <i>Pl. visci</i> | <i>Viscum album</i> | France,<br>Hungary | 100–150 | – | – | 4–6 × 2 | Bacilliform, hyaline,<br>guttulate, apex obtuse,<br>base truncate. | 0 | [13,39] |
|------------------|---------------------|--------------------|---------|---|---|---------|--------------------------------------------------------------------|---|---------|

Remarks: “–” means Not reported.
